# Supplementary material
Source: PubMed Central journal article supplement (PMC2741201)
Supplement: supp_136_4_655__1.pdf [file supp_136_4_655__1.pdf]

## **Table 1. Domain predictions**

---

### **Scooby Domain Predictions (Score=5.014, Domains=13)**

---

S1: 80-192  
S2: 1-79, 193-229  
S3: 629-805  
S4: 805-904  
S5: 904-1029  
S6: 1029-1147  
S7: 1147-1241  
S8: 1241-1344  
S9: 1344-1452  
S10: 1452-1523  
S11: 230-328, 541-628  
S12: 329-410  
S13: 410-540

---

### **DOMAINATION Domain Predictions (Domains=11)**

---

D1: 1-54  
D2: 55-79, 612-668, 732-771  
D3: 80-611  
D4: 669-731  
D5: 772-959  
D6: 960-967  
D7: 988-992, 1267-1475  
D8: 993-1036  
D9: 1037-1051  
D10: 1052-1253  
D11: 1254-1266, 1476-1523

---
